# Supplementary material
Source: HighWire-hosted journal article supplement (https://jnm.snmjournals.org/highwire/filestream/108225/field_highwire_adjunct_files/0/262985_Supplemental_Data.pdf)
Supplement: 262985_Supplemental_Data.pdf [file 262985_Supplemental_Data.pdf]

**Standard-deviation (SD) *in vivo* staging approach.** First, binary severity scores were assigned using 1.5 SD from control mean as the threshold (w-score  $\leq$  1.5 SD = 0 or none; w-score  $>$  1.5 SD = 1 or abnormal binding), and the same rules as for data-driven step 1 were used to assign each participant to stages I/II, III/IV or V/VI. Second, within each stage defined in the previous step, a 3-point pathology severity system was applied using 1.5 and 3 SD as thresholds across all regions (w-score  $\leq$  1.5 SD: 0 or none; w-score  $>$  1.5 SD: 1 or mild/moderate; w-score  $>$  3 SD: 2 or moderate/severe) and one of the six stages were assigned accordingly (stage I-VI). Analysis of variance (ANOVA) was applied to analyse differences among means of disease severity (PSPRS) between stages.

***In vivo* staging based on standard-deviation thresholds.** The same set of decision rules used for data-driven staging applied to the standard-deviation approach identified N=12 patients in stage I/II, N=15 in stage III/IV, N=6 in stage V/VI, while N=9 were not classifiable. The explorative sub-staging identified N=5 patients in stage I, N=7 in stage II, N=10 in stage III, N=5 in stage IV and N=6 in stage V (Supplemental Figure 2A). Across all patients, *in vivo* stages did not significantly relate to clinical severity (ANOVA  $p>0.05$ , Supplemental Figure 2B and Supplemental Figure 2C). Applying the same approach on controls, N=36 participants were classified in no stage and N=3 in stage I. In 8 of the 9 patients who donated their brains, pathology stage as determined by *in vivo*  $^{18}\text{F}$ -FTP PET, was less than or equal to that determined at *post-mortem* (Supplemental Figure 2D), while one patient was not classifiable with the standard-deviation staging approach.

**Supplemental Figure 1. Regions of interest considered for *in vivo* staging and corresponding regional w-scores.** Panel A: Orthogonal planes through the regions of interest (ROIs) used to determine  $^{18}\text{F}$ -FTP non-displaceable binding potential for *in vivo* staging overlaid on the native space T1 MRI for two representative patients. The ROIs are: globus pallidus (cyan); cerebellar white matter (yellow); dentate nucleus (red); middle frontal gyrus (blue); and lingual gyrus and cuneus (green). Panel B: Regional w-scores accounting for age and scanner type. For our analyses, cerebellar white matter (WM) was combined with dentate nucleus, and lingual gyrus was combined with the cuneus.

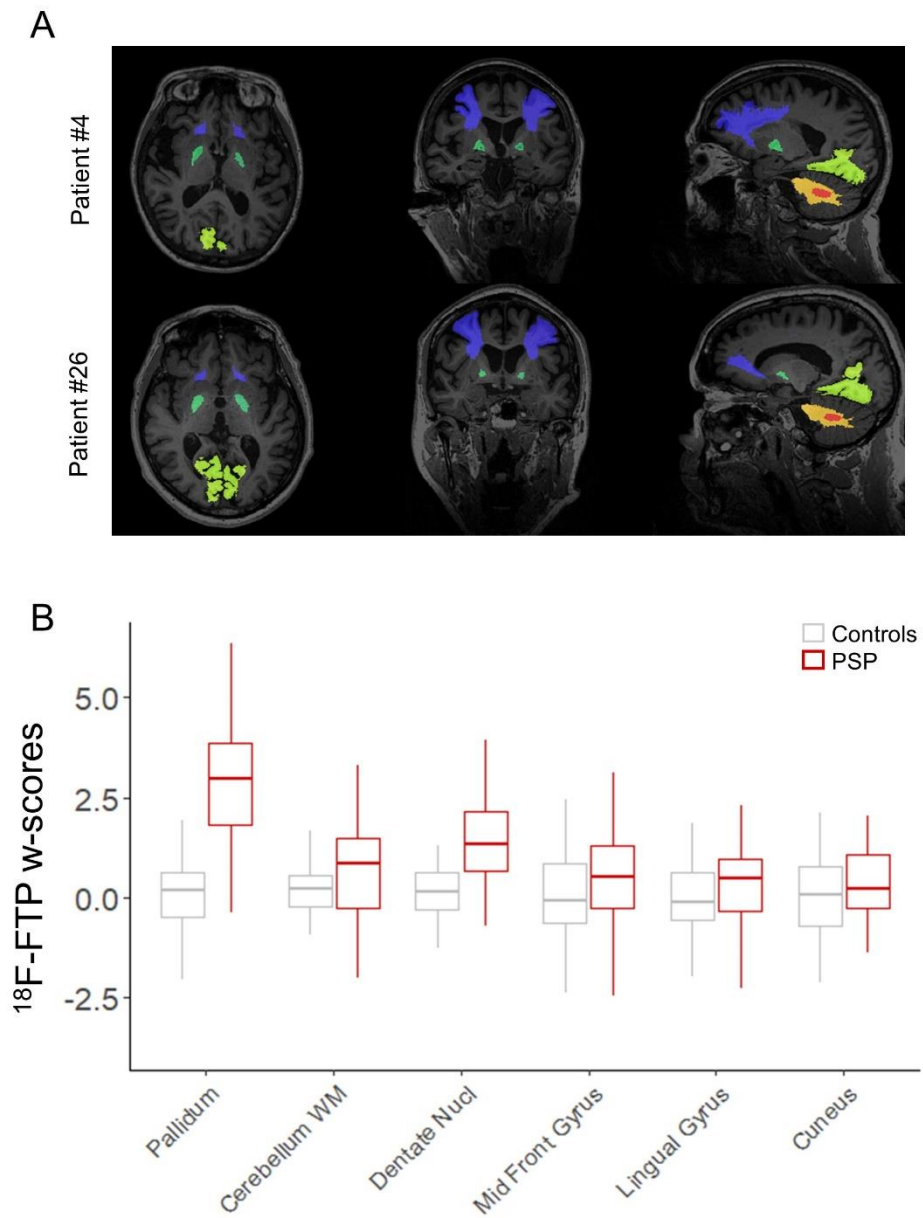

**Supplemental Figure 2. *In vivo* staging based on standard-deviation thresholds.** Panel A: severity scores are reported for each group of regions considered to define *in vivo* stages (STEP 1: 0 = absent; 1 = present) and sub-stages (STEP 2: 0 = none; 1 = mild/moderate pathology; 2 = moderate/severe pathology): progressive supranuclear palsy (PSP), PSP-Richardson’s syndrome (-RS), PSP-frontal (-F), PSP-progressive gait freezing (-PGF), PSP-oculomotor (-OM), PSP-corticobasal syndrome (-CBS), globus pallidum (GP), cerebellum (CER, white matter and dentate nucleus), middle frontal gyrus (FR) and occipital lobe (OCC – lingual gyrus and cuneus). Panels B and C: boxplots of PSP rating scale (PSPRS) scores by stages defined with STEP 1 (panel B) and STEP 2 (panel C). Panel D: *in vivo* and *post-mortem* stages for 9 patients who underwent <sup>18</sup>F-FTP PET and donated their brains. For *in vivo* stages, results with both approaches are reported for the 9 patients.

**A**

| Phenotype | STEP 1 |     |    |     | Stage  | STEP 2 |     |    |     | Sub-Stage |
|-----------|--------|-----|----|-----|--------|--------|-----|----|-----|-----------|
|           | GP     | CER | FR | OCC |        | GP     | CER | FR | OCC |           |
| PSP-RS    | 1      | 0   | 0  | 0   | I/II   | 1      | 0   | 0  | 0   | I         |
| PSP-RS    | 1      | 0   | 0  | 0   | I/II   | 1      | 0   | 0  | 0   | I         |
| PSP-RS    | 1      | 0   | 0  | 1   | I/II   | 1      | 0   | 0  | 1   | I         |
| PSP-RS    | 1      | 0   | 0  | 0   | I/II   | 1      | 0   | 0  | 0   | I         |
| PSP-RS    | 1      | 0   | 0  | 0   | I/II   | 1      | 0   | 0  | 0   | I         |
| PSP-RS    | 1      | 0   | 0  | 0   | I/II   | 2      | 0   | 0  | 0   | II        |
| PSP-RS    | 1      | 0   | 0  | 0   | I/II   | 2      | 0   | 0  | 0   | II        |
| PSP-RS    | 1      | 0   | 0  | 0   | I/II   | 2      | 0   | 0  | 0   | II        |
| PSP-F     | 1      | 0   | 0  | 0   | I/II   | 2      | 0   | 0  | 0   | II        |
| PSP-PGF   | 1      | 0   | 0  | 0   | I/II   | 2      | 0   | 0  | 0   | II        |
| PSP-RS    | 1      | 0   | 0  | 0   | I/II   | 2      | 0   | 0  | 0   | II        |
| PSP-RS    | 1      | 0   | 0  | 0   | I/II   | 2      | 0   | 0  | 0   | II        |
| PSP-RS    | 1      | 1   | 1  | 0   | III/IV | 1      | 1   | 1  | 0   | III       |
| PSP-RS    | 1      | 1   | 0  | 0   | III/IV | 1      | 1   | 0  | 0   | III       |
| PSP-RS    | 1      | 1   | 0  | 0   | III/IV | 1      | 1   | 0  | 0   | III       |
| PSP-RS    | 1      | 1   | 0  | 0   | III/IV | 1      | 1   | 0  | 0   | III       |
| PSP-RS    | 1      | 1   | 0  | 0   | III/IV | 2      | 1   | 0  | 0   | III       |
| PSP-RS    | 1      | 1   | 0  | 0   | III/IV | 2      | 1   | 0  | 0   | III       |
| PSP-RS    | 1      | 1   | 0  | 0   | III/IV | 2      | 1   | 0  | 0   | III       |
| PSP-F     | 1      | 1   | 0  | 0   | III/IV | 2      | 1   | 0  | 0   | III       |
| PSP-RS    | 1      | 1   | 0  | 0   | III/IV | 2      | 1   | 0  | 0   | III       |
| PSP-OM    | 1      | 1   | 0  | 0   | III/IV | 2      | 1   | 0  | 0   | III       |
| PSP-RS    | 1      | 1   | 0  | 0   | III/IV | 1      | 2   | 0  | 0   | IV        |
| PSP-RS    | 1      | 0   | 1  | 0   | III/IV | 1      | 0   | 2  | 0   | IV        |
| PSP-RS    | 1      | 1   | 1  | 0   | III/IV | 2      | 2   | 1  | 0   | IV        |
| PSP-F     | 1      | 1   | 1  | 0   | III/IV | 2      | 2   | 1  | 0   | IV        |
| PSP-F     | 1      | 0   | 1  | 0   | III/IV | 2      | 0   | 2  | 0   | IV        |
| PSP-RS    | 1      | 1   | 0  | 1   | V/VI   | 1      | 2   | 0  | 1   | V         |
| PSP-RS    | 1      | 1   | 1  | 1   | V/VI   | 2      | 2   | 1  | 1   | V         |
| PSP-CBS   | 1      | 1   | 1  | 1   | V/VI   | 2      | 1   | 1  | 1   | V         |
| PSP-RS    | 1      | 1   | 1  | 1   | V/VI   | 2      | 1   | 1  | 1   | V         |
| PSP-RS    | 1      | 1   | 1  | 1   | V/VI   | 2      | 1   | 1  | 1   | V         |
| PSP-RS    | 1      | 0   | 1  | 1   | V/VI   | 2      | 0   | 2  | 1   | V         |
| PSP-RS    | 0      | 0   | 0  | 0   | NULL   | 0      | 0   | 0  | 0   | NULL      |
| PSP-RS    | 0      | 1   | 0  | 0   | NULL   | 0      | 1   | 0  | 0   | NULL      |
| PSP-RS    | 0      | 0   | 0  | 0   | NULL   | 0      | 0   | 0  | 0   | NULL      |
| PSP-RS    | 0      | 0   | 0  | 0   | NULL   | 0      | 0   | 0  | 0   | NULL      |
| PSP-RS    | 0      | 0   | 0  | 0   | NULL   | 0      | 0   | 0  | 0   | NULL      |
| PSP-RS    | 0      | 0   | 0  | 0   | NULL   | 0      | 0   | 0  | 0   | NULL      |
| PSP-RS    | 0      | 0   | 0  | 0   | NULL   | 0      | 0   | 0  | 0   | NULL      |
| PSP-RS    | 0      | 0   | 0  | 0   | NULL   | 0      | 0   | 0  | 0   | NULL      |
| PSP-RS    | 0      | 0   | 0  | 0   | NULL   | 0      | 0   | 0  | 0   | NULL      |
| PSP-RS    | 0      | 1   | 0  | 0   | NULL   | 0      | 1   | 0  | 0   | NULL      |
| PSP-RS    | 0      | 0   | 0  | 0   | NULL   | 0      | 0   | 0  | 0   | NULL      |

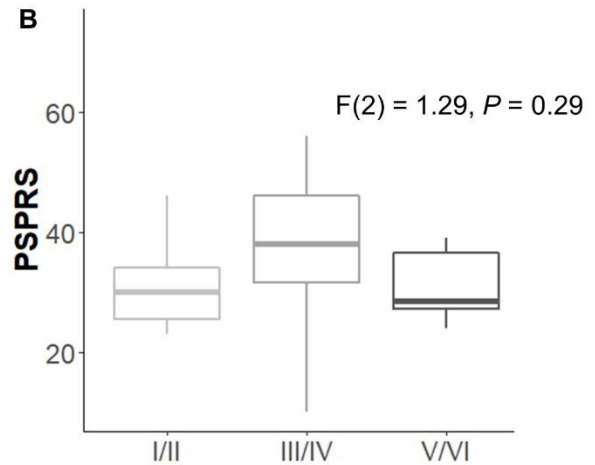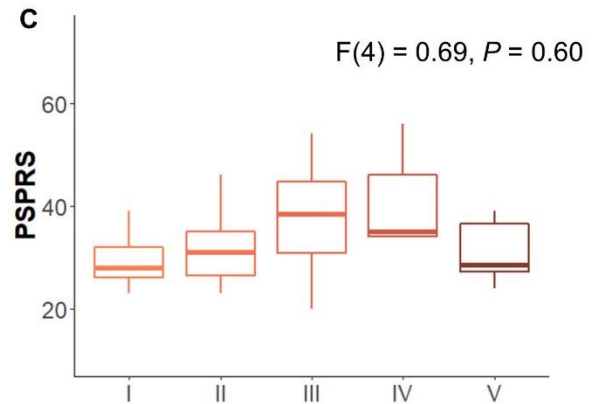

**D**

| Syndrome | In vivo stage: data-driven | In vivo stage: std-dev | Post mortem stage |
|----------|----------------------------|------------------------|-------------------|
| PSP-RS   | I                          | NULL                   | V                 |
| PSP-RS   | II                         | II                     | II                |
| PSP-RS   | III                        | II                     | III               |
| PSP-RS   | IV                         | III                    | III               |
| PSP-RS   | IV                         | III                    | IV                |
| PSP-RS   | IV                         | III                    | IV                |
| PSP-RS   | IV                         | IV                     | V                 |
| PSP-RS   | IV                         | III                    | V                 |
| PSP-F    | IV                         | IV                     | VI                |
